# Supplementary material for: Management of solitary fibrous tumours of the pleura: a systematic review and meta-analysis
Source: PubMed Central journal article supplement — ERJ Open Res. 2020 Aug 17;6(3):00055-2020. doi: 10.1183/23120541.00055-2020 (PMC7430150; doi:10.1183/23120541.00055-2020), 2020-08-17
Supplement: 00055-2020.supplement1.pdf [file 00055-2020.supplement1.pdf]

# Reviewing the management of solitary pleural fibromas

Searches carried out by Eli Harriss, an Outreach Librarian at the Bodleian Health Care Libraries. Search date 01/04/19.

## Search Strategies

### PubMed

((((((((((("Solitary Fibrous Tumor, Pleural"[Mesh]) OR Solitary fibrous tumor of the pleura[Title/Abstract]) OR Solitary fibrous tumors of the pleura[Title/Abstract]) OR Solitary fibrous tumour of the pleura[Title/Abstract]) OR Solitary fibrous tumours of the pleura[Title/Abstract]) OR SFTP[Title/Abstract]) OR SFTPs[Title/Abstract])) OR pleural fibroma\*[Title/Abstract]) OR benign mesothelioma\*[Title/Abstract]) OR localized fibrous mesothelioma\*[Title/Abstract]) OR localised fibrous mesothelioma\*[Title/Abstract]) OR submesothelial fibroma\*[Title/Abstract]) OR localized fibrous tumor pleura[Title/Abstract]) OR localized fibrous tumour pleura[Title/Abstract]

Filters activated: English.

### Database: Embase 1974 to present

Search Strategy:

- 
- 1 solitary fibrous tumor/ (2614)
  - 2 ("solitary fibrous tum\*" adj3 pleura\*).ti,ab. (520)
  - 3 SFTP\*.ti,ab. (893)
  - 4 "pleural fibroma\*".ti,ab. (69)
  - 5 "benign mesothelioma\*".ti,ab. (102)
  - 6 "locali\* fibrous mesothelioma\*".ti,ab. (64)
  - 7 "submesothelial fibroma\*".ti,ab. (8)
  - 8 ("locali\* fibrous tumo\*" adj2 pleura\*).ti,ab. (11)
  - 9 1 or 2 or 3 or 4 or 5 or 6 or 7 or 8 (3740)
  - 10 9 (3740)
  - 11 limit 10 to english language (3277)

### Cochrane Central Register of Controlled Trials

#### Issue 4 of 12, April 2019

- |    |                                                                      |   |
|----|----------------------------------------------------------------------|---|
| #1 | MeSH descriptor: [Solitary Fibrous Tumor, Pleural] explode all trees | 0 |
| #2 | ("solitary fibrous tum*" near/3 pleura*)                             | 0 |
| #3 | SFTP*                                                                | 6 |
| #4 | "pleural fibroma*"                                                   | 0 |
| #5 | "benign mesothelioma*"                                               | 1 |
| #6 | "locali* fibrous mesothelioma*"                                      | 0 |
| #7 | "submesothelial fibroma*"                                            | 0 |
| #8 | "locali* fibrous tumo*" near/2 pleura*                               | 0 |
| #9 | #1 or #2 or #3 or #4 or #5 or #6 or #7 or #8                         | 7 |

## Scopus

( TITLE-ABS-KEY ( "solitary fibrous tum\*" W/3 pleura\* ) ) OR ( TITLE-ABS-KEY ( sftp\* ) ) OR ( TITLE-ABS-KEY ( "pleural fibroma\*" ) ) OR ( TITLE-ABS-KEY ( "benign mesothelioma\*" ) ) OR ( TITLE-ABS-KEY ( "locali\* fibrous mesothelioma\*" ) ) OR ( TITLE-ABS-KEY ( "submesothelial fibroma\*" ) ) OR ( TITLE-ABS-KEY ( "locali\* fibrous tumo\*" W/2 pleura\* ) ) AND ( LIMIT-TO ( LANGUAGE , "English" ) )

## Web of Science – Core Collection

# 1 350 TOPIC: ("solitary fibrous tum\*" near/3 pleura\*) OR TITLE: ("solitary fibrous tum\*" near/3 pleura\*)

# 2 531 TOPIC: (sftp\*) OR TITLE: (sftp\*)

# 3 46 TOPIC: ("pleural fibroma\*") OR TITLE: ("pleural fibroma\*")

# 4 61 TOPIC: ("benign mesothelioma\*") OR TITLE: ("benign mesothelioma\*")

# 5 41 TOPIC: ("locali\* fibrous mesothelioma\*") OR TITLE: ("locali\* fibrous mesothelioma\*")

# 6 7 TOPIC: ("submesothelial fibroma\*") OR TITLE: ("submesothelial fibroma\*")

# 7 57 TOPIC: ("locali\* fibrous tumo\*" near/2 pleura\*) OR TITLE: ("locali\* fibrous tumo\*" near/2 pleura\*)

# 8 979 #7 OR #6 OR #5 OR #4 OR #3 OR #2 OR #1

# 9 908 #7 OR #6 OR #5 OR #4 OR #3 OR #2 OR #1

Refined by: LANGUAGES: ( ENGLISH )

## Search Results

|                                     |      |
|-------------------------------------|------|
| PubMed                              | 795  |
| Ovid Embase                         | 3277 |
| The Cochrane Library                | 7    |
| Scopus                              | 1382 |
| Web of Science –<br>core collection | 1016 |
| Total                               | 6477 |
| Deduplicated Total                  | 3958 |
