# Supplementary material for: Management of solitary fibrous tumours of the pleura: a systematic review and meta-analysis
Source: PubMed Central journal article supplement — ERJ Open Res. 2020 Aug 17;6(3):00055-2020. doi: 10.1183/23120541.00055-2020 (PMC7430150; doi:10.1183/23120541.00055-2020), 2020-08-17
Supplement: 00055-2020.supplement2.pdf [file 00055-2020.supplement2.pdf]

| First author    | Number resected        | Complete resection (%) | Incomplete Resection margins                   | Number Malignant (%) | Tumour diameter average (cm)                             | Tumour diameter (range, cm) | Malignancy criteria                                                                                                                |
|-----------------|------------------------|------------------------|------------------------------------------------|----------------------|----------------------------------------------------------|-----------------------------|------------------------------------------------------------------------------------------------------------------------------------|
| Boddeart        | 80/80 (100%)           | 76/79 (96%)            | R1 – bSFTP(1),<br>R1 - mSFTP(2,<br>1 recurred) | 28/79 (35%)          | 7.6 <sup>(MN)</sup> ±<br>4.9 <sup>(SD)</sup>             | -                           | England (1989)                                                                                                                     |
| Bylicki         | 64/68 (94%)            | 57/64 (89%)            | R1 – SFTP (5)<br>R2 – SFTP (2)                 | 39/68 (57%)          | 9                                                        | 2.8 – 25                    | England (1989)                                                                                                                     |
| Cardillo        | 110/110 (100%)         | 100%                   | All R0                                         | 15/110 (13.6%)       | 8.5                                                      | 0.4 – 28                    | England (1989)                                                                                                                     |
| Chu             | 39/40 (97.5%)          | 100%                   | -                                              | 7/39 (18%)           | Tumour <10cm<br>in 24/40 cases                           | -                           | -                                                                                                                                  |
| Demicco (2012)  | 29/31 (93.5%)          | -                      | Mixed data                                     | -                    | 15 <sup>(MD)</sup>                                       | 1 – 30                      | -                                                                                                                                  |
| Demicco (2017)  | 36/36 (100%)           | -                      | Mixed data                                     | -                    | 5.8 <sup>(MD)</sup>                                      | 1 – 23                      | -                                                                                                                                  |
| DeVito          | 27/28 (96.4%)          | 23/24 (95.8%)          | R1 – bSFTP (1)<br>No recurrence                | 13/28 (46.4%)        | Tumour <10cm in<br>17/27 cases                           | -                           | England (1989) &<br>World Health Organisation (2013)                                                                               |
| England         | 216/223 (96.8%)        | -                      |                                                | 82/223 (36.8%)       | 62% >10cm                                                | 1-39                        | England (1989)                                                                                                                     |
| Enon            | 25/25 (100%)<br>Benign | 100%                   | All surgical margins clear                     | 3/28 (10.7%)         | bSFTP 8.7 <sup>(MN)</sup>                                | 3 – 22                      | Increased cellularity with crowding and overlapping nuclei, nuclear pleomorphism, and a high mitotic activity (>4 mitosis/ 10HPF). |
| Franzen         | 42/42 (100%)           | 100%                   | All R0                                         | 18/42 (42.9%)        | 6.2 <sup>(MD)</sup>                                      | 4.8 - 14.1                  | One or more of: high cellularity, high mitotic activity (>4 mitosis/ 10 HPF) or pleomorphism.                                      |
| Gholami         | 67/67 (100%)           | -                      | Mixed data                                     | Mixed data           | Mixed data                                               | -                           | Four or greater mitoses per HPF                                                                                                    |
| Guo             | 39/39 (100%)           | 100%                   | All surgical margins clear                     | 4/39 (10.3%)         | 7.71 <sup>(MN)</sup> ± 4.78 <sup>(SD)</sup>              | -                           | England (1989)                                                                                                                     |
| Gupta           | 28/28 (100%)           | -                      | -                                              | 10/28 (36%)          | bSFTP 6.05 <sup>(MD)</sup><br>mSFTP 15.7 <sup>(MD)</sup> | -                           | World Health Organisation (2013)                                                                                                   |
| Harrison–Phipps | 84/84 (100%)           | 100%                   | -                                              | 11/84 (13%)          | bSFTP 4.5 <sup>(MD)</sup><br>mSFTP 12.0 <sup>(MD)</sup>  | -                           | >4 mitosis/10HPF seen on light microscopic analysis                                                                                |

|           |                   |                |                                             |                  |                                                                    |            |                                                                        |
|-----------|-------------------|----------------|---------------------------------------------|------------------|--------------------------------------------------------------------|------------|------------------------------------------------------------------------|
| Helage    | 56/56<br>(100%)   | 100%           | All R0                                      | 23/56<br>(41%)   | bSFTP 7.5 <sup>(MN)</sup><br>mSFTP 12.4 <sup>(MN)</sup>            | -          | England (1989)                                                         |
| Kim       | 40/40<br>(100%)   | -              | -                                           | -                | Tumour<br><10cm in<br>28/40                                        | -          | -                                                                      |
| Lahon     | 157/157<br>(100%) | Likely all     | -                                           | 67/157<br>(43%)  | 9 <sup>(MD)</sup>                                                  | 0.3 – 30   | England (1989)                                                         |
| Liu       | 21/21<br>(100%)   | 100%           | All surgical<br>margins clear               | 3/21<br>(14.3%)  | 6.5 <sup>(MD)</sup>                                                | 4.0 – 18.5 | England (1989)                                                         |
| McGuire   | 23/26<br>(88.5%)  | 100%           | -                                           | 8/23<br>(34.8%)  | 9.1 <sup>(MN)</sup>                                                | -          | England (1989)                                                         |
| O'Neil    | -                 | -              | -                                           | 18/49<br>(37%)   | -                                                                  | -          | Hypercellular and mitotically active ( $\geq 4$<br>mitoses per 10 HPF) |
| Rena      | 21/21<br>(100%)   | 100%           | -                                           | 8/21<br>(38%)    | -                                                                  | 2.2 – 33   | -                                                                      |
| Santos    | 34/34<br>(100%)   | 100%           | -                                           | 7/34<br>(21%)    | 7.2 <sup>(MN)</sup>                                                | 1.2 – 24   | England (1989)                                                         |
| Schmid    | 22/25<br>(88%)    | 20/22<br>(91%) | R1 – bSFTP(1),<br>mSFTP(1)<br>No recurrence | 8/25<br>(32%)    | 11.6 <sup>(MN)</sup>                                               | 2 – 25     | World Health Organisation (2013)                                       |
| Tan       | 82/82<br>(100%)   | -              | -                                           | 12/82<br>(14.6%) | bSFTP 8.89 <sup>(MN)</sup><br>mSFTP<br>13.79 <sup>(MN)</sup>       | -          | England (1989)                                                         |
| Tapias    | 59/59<br>(100%)   | 100%           | All R0                                      | -                | 7.3 <sup>(MN)</sup> $\pm$ 6.7 <sup>(SD)</sup><br>5 <sup>(MD)</sup> | 0.7 – 33   | -                                                                      |
| Vejvodova | 20/22<br>(90.9%)  | -              | -                                           | 4/22<br>(18.2%)  | -                                                                  | 3 – 30     | >4 mitosis/2mm <sup>2</sup>                                            |
| Yeom      | 33/41<br>(80.5%)  | -              | -                                           | 6/41<br>(14.6%)  | 6 <sup>(MD)</sup>                                                  | 1 – 17     | England (1989)                                                         |

\*bSFTP – benign solitary fibrous tumour of the pleura, mSFTP – malignant solitary fibrous tumour of the pleura, MD – median, MN – mean, SD – standard deviation, HPF – high powered field, R0 – all resection margins clear, R1 – microscopic positive margins, R2 grossly positive margins  
England (1989) criteria - One or more of: increasing mitotic activity (>4 mitoses/ 10 HPF); high cellularity with crowding and overlapping of nuclei; presence of necrosis; and pleomorphism
