# Supplementary material for: Management of solitary fibrous tumours of the pleura: a systematic review and meta-analysis
Source: PubMed Central journal article supplement — ERJ Open Res. 2020 Aug 17;6(3):00055-2020. doi: 10.1183/23120541.00055-2020 (PMC7430150; doi:10.1183/23120541.00055-2020), 2020-08-17
Supplement: 00055-2020.supplement3.pdf [file 00055-2020.supplement3.pdf]

| Excluded               | Included        | Location of crossover                            |
|------------------------|-----------------|--------------------------------------------------|
| Diebold (2017) (1)     | Franzen (2014)  | University Hospital Zurich                       |
| Gold (2002) (2)        | Gholami         | Memorial Sloan-Kettering Cancer Center, New York |
| Kohler (2007) (3)      | Franzen (2014)  | University Hospital Zurich                       |
| Lococo (2012) (4)      | Cardillo        | Forlanini Hospital, Rome                         |
| Magdeleinat (2002) (5) | Lahon, Helage   | Marie Lannelongue Hospital, Hôtel-Dieu, France   |
| Reisenauer (2018) (6)  | Harrison-Phipps | Mayo Clinic                                      |
| Sung (2005) (7)        | Yeom            | Asan Medical Center                              |
| Tapias (2015) (8)      | Lahon           | Marie Lannelongue Hospital                       |

|                   |                                                                  |
|-------------------|------------------------------------------------------------------|
| Milano (2011) (9) | SEER Database – crossover with any US centre providing SEER data |
| Yao (2019) (10)   | SEER Database – crossover with any US centre providing SEER data |

1. Diebold M, Soltermann A, Hottinger S, Haile SR, Bubendorf L, Komminoth P, et al. Prognostic value of MIB-1 proliferation index in solitary fibrous tumors of the pleura implemented in a new score - a multicenter study. *Respiratory research*. 2017;18(1):210-.
2. Gold JS, Antonescu CR, Hajdu C, Ferrone CR, Hussain M, Lewis JJ, et al. Clinicopathologic correlates of solitary fibrous tumors. *Cancer*. 2002;94(4):1057-68.
3. Kohler M, Clarenbach CF, Kestenholz P, Kurrer M, Steinert HC, Russi EW, et al. Diagnosis, treatment and long-term outcome of solitary fibrous tumours of the pleura. *European journal of cardio-thoracic surgery : official journal of the European Association for Cardio-thoracic Surgery*. 2007;32(3):403-8.
4. Lococo F, Cesario A, Cardillo G, Filosso P, Galetta D, Carbone L, et al. Malignant Solitary Fibrous Tumors of the Pleura Retrospective Review of a Multicenter Series. *Journal of Thoracic Oncology*. 2012;7(11):1698-706.
5. Magdeleinat P, Alifano M, Petino A, Le Rochais JP, Dulmet E, Galateau F, et al. Solitary fibrous tumors of the pleura: clinical characteristics, surgical treatment and outcome. *European journal of cardio-thoracic surgery : official journal of the European Association for Cardio-thoracic Surgery*. 2002;21(6):1087-93.
6. Reisenauer JS, Mneimneh W, Jenkins S, Mansfield AS, Aubry MC, Fritchie KJ, et al. Comparison of Risk Stratification Models to Predict Recurrence and Survival in Pleuropulmonary Solitary Fibrous Tumor. *Journal of thoracic oncology : official publication of the International Association for the Study of Lung Cancer*. 2018;13(9):1349-62.
7. Sung SH, Chang JW, Kim J, Lee KS, Han J, Park SI. Solitary fibrous tumors of the pleura: surgical outcome and clinical course. *The Annals of thoracic surgery*. 2005;79(1):303-7.
8. Tapias LF, Mercier O, Ghigna MR, Lahon B, Lee H, Mathisen DJ, et al. Validation of a scoring system to predict recurrence of resected solitary fibrous tumors of the pleura. *Chest*. 2015;147(1):216-23.
9. Milano MT, Singh DP, Zhang H. Thoracic malignant solitary fibrous tumors: A population-based study of survival. *Journal of thoracic disease*. 2011;3(2):99-104.
10. Yao MJ, Ding L, Atay SM, Toubat O, Ebner P, David EA, et al. A Modern Reaffirmation of Surgery as the Optimal Treatment for Solitary Fibrous Tumors of the Pleura. *The Annals of thoracic surgery*. 2019;107(3):941-6.
