# Supplementary material for: Management of solitary fibrous tumours of the pleura: a systematic review and meta-analysis
Source: PubMed Central journal article supplement — ERJ Open Res. 2020 Aug 17;6(3):00055-2020. doi: 10.1183/23120541.00055-2020 (PMC7430150; doi:10.1183/23120541.00055-2020), 2020-08-17
Supplement: 00055-2020.supplement4.pdf [file 00055-2020.supplement4.pdf]

| First author and year | Department for first author | Years covered | Age                                                       | Types of SFT included            | Pleural cases |
|-----------------------|-----------------------------|---------------|-----------------------------------------------------------|----------------------------------|---------------|
| Boddeart (2015)       | Thoracic Surgery            | 1984-2011     | 60 <sup>(MD)</sup>                                        | All pleural origin               | 80            |
| Bylicki (2015)        | Pulmonary Medicine          | 2000-2012     | 62 <sup>(MD)</sup>                                        | All pleural origin               | 68            |
| Cardillo (2009)       | Thoracic Surgery            | 1990 - 2008   | 56.4 <sup>(MN)</sup>                                      | Pleural including inverted       | 110           |
| Chu (2012)            | Thoracic Surgery            | 1998 - 2010   | 48 <sup>(MD)</sup>                                        | Thoracic                         | 40            |
| Demicco (2012)        | Pathology                   | 1986-2009     | 61 <sup>(MD)</sup>                                        | All extra-meningeal              | 31            |
| Demicco (2017)        | Pathology                   | 1996 - 2015   | 64 <sup>(MD)</sup>                                        | All extra-meningeal              | 36            |
| DeVito (2015)         | Oncology                    | 1993- 2010    | 62 <sup>(MD)</sup>                                        | All                              | 28            |
| England (1989)        | Pathology                   | -             | 57 <sup>(MD)</sup>                                        | Pleural including inverted       | 223           |
| Enon (2012)           | Thoracic Surgery            | 1985 - 2009   | 41.1 <sup>(MN benign)</sup>                               | Pleural including intrapulmonary | 25            |
| Franzen (2014)        | Pulmonary Medicine          | 1992 - 2012   | 62 <sup>(MD)</sup>                                        | Thoracic                         | 42            |
| Gholami (2017)        | Surgery                     | 1982-2015     | 57 <sup>(MD)</sup>                                        | All                              | 67            |
| Guo (2011)            | Thoracic Surgery            | 2004 - 2008   | 45 <sup>(MN)</sup>                                        | Thoracic                         | 39            |
| Gupta (2017)          | Medical imaging             | 2003- 2012    | 58 <sup>(MN benign)</sup><br>66 <sup>(MN malignant)</sup> | All pleural origin               | 28            |

|                        |                               |             |                      |                                  |     |
|------------------------|-------------------------------|-------------|----------------------|----------------------------------|-----|
| Harrison–Phipps (2009) | Thoracic Surgery              | 1972 - 2002 | 57 <sup>(MD)</sup>   | Pleural including intrapulmonary | 84  |
| Helage (2016)          | Radiology                     | 2004 - 2012 | 60 <sup>(MN)</sup>   | -                                | 56  |
| Kim (2017)             | Pathology                     | 1995 - 2014 | 60.2 <sup>(MN)</sup> | All                              | 40  |
| Lahon (2012)           | Thoracic and Vascular Surgery | 1980 - 2010 | 58 <sup>(MD)</sup>   | All pleural origin               | 157 |
| Liu (2010)             | Cardiothoracic Surgery        | 2000 - 2008 | 52.5 <sup>(MN)</sup> | All pleural origin               | 21  |
| McGuire (2016)         | Thoracic Surgery              | 1983 - 2013 | 63.6 <sup>(MN)</sup> | Pleural including inverted       | 26  |
| O'Neil (2017)          | Department of Imaging         | 2000 - 2015 | 55 <sup>(MD)</sup>   | All                              | 57  |
| Rena (2000)            | Thoracic Surgery              | 1984 - 2000 | 51 <sup>(MD)</sup>   | Pleural including intrapulmonary | 21  |
| Santos (2005)          | Thoracic Surgery              | 1990 - 2003 | 59 <sup>(MD)</sup>   | Thoracic                         | 34  |
| Schmid (2015)          | Thoracic Surgery              | 2002 - 2014 | 66 <sup>(MN)</sup>   | Pleural including inverted       | 25  |
| Tan (2018)             | Surgery                       | 2003 - 2015 | 58 <sup>(MD)</sup>   | All pleural origin               | 82  |
| Tapias (2012)          | Thoracic Surgery              | 1977 - 2010 | 57 <sup>(MN)</sup>   | Pleural including intrapulmonary | 59  |
| Vejvodova (2017)       | Surgery                       | 2000 - 2015 | 59.6 <sup>(MN)</sup> | Pleural including intrapulmonary | 22  |
| Yeom (2015)            | Radiology                     | 1997 - 2012 | 59 <sup>(MD)</sup>   | Thoracic                         | 41  |

MD – median, MN – mean, SFT – solitary fibrous tumour
