# Supplementary material for: Management of solitary fibrous tumours of the pleura: a systematic review and meta-analysis
Source: PubMed Central journal article supplement — ERJ Open Res. 2020 Aug 17;6(3):00055-2020. doi: 10.1183/23120541.00055-2020 (PMC7430150; doi:10.1183/23120541.00055-2020), 2020-08-17
Supplement: 00055-2020.supplement5.pdf [file 00055-2020.supplement5.pdf]

| First author      | No. of cases with available FU data | Overall recurrence | Benign Recurrence | Malignant recurrence | Local Recurrence | Distant Recurrence | Time to recurrence months, (range)                                            | FU Duration months (range)                         |
|-------------------|-------------------------------------|--------------------|-------------------|----------------------|------------------|--------------------|-------------------------------------------------------------------------------|----------------------------------------------------|
| Boddeart^^        | 75                                  | 3/75 (4%)          | 0 (0%)            | 3/28 (10.7%)         | 3/75 (4%)        | 0%                 | 19 <sup>(MD)</sup> (8-59)                                                     | 69 <sup>(MD)</sup> (1-315)                         |
| Bylicki^^         | 68                                  | 26/68 (38%)        | -                 | -                    | 14/68 (20.6%)    | 12/68 (17.6%)      | -                                                                             | Unclear                                            |
| Cardillo^         | 110                                 | 8/110 (7%)         | 4/95 (4%)         | 4/15 (27%)           | -                | -                  | -                                                                             | (12-222)                                           |
| Chu               | 29                                  | 0/29 (0%)          | -                 | -                    | -                | -                  | -                                                                             | 35 <sup>(MN)</sup> (2-117)<br>65.5 <sup>(MD)</sup> |
| Demicco (2012)    |                                     | 12/29 (41.4%)      | -                 | -                    | 3/29 (10%)       | 9/29 (31%)         | Local: 141 <sup>(MD)</sup> (15-195)<br>Metastases: 30 <sup>(MD)</sup> (4-119) | 48 <sup>(MD)</sup> (0-279)                         |
| Demicco (2017)    | 20                                  | 1/20 (5%)          | -                 | -                    | 0/20 (0%)        | 1/20 (5%)          | -                                                                             | Mixed data                                         |
| DeVito^           | 28                                  | 12/28 (42.9%)      | 4/15 (27%)        | 8/13 (61.5%)         | 6/28 (21.4%)     | 8/28 (28.6%)       | -                                                                             | 55.3 <sup>(MD)</sup>                               |
| England           | 169                                 | 28/169 (16.6%)     | 2/98 (2%)         | 39/71 (55%)          | -                | -                  | -                                                                             | 57 <sup>(MD)</sup>                                 |
| Enon              | 25                                  | 0/25 (0%)          | -                 | -                    | -                | -                  | -                                                                             | 33.6 <sup>(MN)</sup> (9-142)                       |
| Franzen           | 42                                  | 4/42 (9.5%)        | -                 | -                    | -                | -                  | -                                                                             | 39 <sup>(MD)</sup> (14-78)                         |
| Gholami           |                                     | -                  | -                 | -                    | 7/66 (10.6%)     | 7/67 (10.4%)       | -                                                                             | 73 <sup>(MN)</sup> (1-264)                         |
| Guo^^             | 38                                  | 1/38 (2.6%)        | 0/35 (0%)         | 1/4 (25%)            | 0/39 (0%)        | 1/39 (2.6%)        | 6 <sup>(MD)</sup>                                                             | 40.3 <sup>(MN)</sup> (30-89)                       |
| Gupta             | 16                                  | 3/16 (18.8%)       | 0/10 (0%)         | 3/6 (50%)            | 3/16 (18.8%)     | 0/16 (0%)          | -                                                                             | 36 <sup>(MN)</sup> (12-120)                        |
| Harrison-Phipps^^ | 84                                  | 8/84 (9.5%)        | 2/73 (2.7%)       | 6/11 (54.5%)         | 3/81 (3.7%)      | 5/81 (6.2%)        | mSFTP – 34 <sup>(MD)</sup><br>bSFTP – 83 <sup>(MD)</sup>                      | 146 <sup>(MD)</sup> (23-387)                       |
| Helage            | 9                                   | 7/9* (77.8%)       | 0                 | 7*                   | 7*               | 0*                 | 36 <sup>(MD)</sup>                                                            | 27 <sup>(MD)</sup> (3-84)                          |

|                         |     |                   |                |                 |                 |                | (2 – 84)                                                            |                                               |
|-------------------------|-----|-------------------|----------------|-----------------|-----------------|----------------|---------------------------------------------------------------------|-----------------------------------------------|
| Kim                     | 40  | 5/40<br>(12.5%)   | -              | -               | 4/40<br>(10%)   | 1/40<br>(2.5%) | 4 years                                                             | Mixed data                                    |
| Lahon <sup>^</sup>      | 102 | 15/102<br>(14.7%) | 2/60<br>(%)    | 13/42<br>(%)    | 10/102<br>(%)   | 5/102<br>(%)   | 29 <sup>(MD)</sup>                                                  | 168 <sup>(MD)</sup>                           |
| Liu                     | 21  | 0/21<br>(0%)      | 0/21<br>(0%)   | 0/21<br>(0%)    | 0/21<br>(0%)    | 0/21<br>(0%)   | -                                                                   | 43 <sup>(MD)</sup>                            |
| McGuire <sup>^</sup>    | 23  | 4/23<br>(17.4%)   | 3/15<br>(20%)  | 1/8<br>(12.5%)  | 3/23<br>(13%)   | 1/23<br>(4.3%) | Local: 176 <sup>(MN)</sup> ±82<br>Metastases: 87 <sup>(MN)</sup> ±4 | 125.8 <sup>(MN)</sup>                         |
| O'Neil                  |     | -                 | -              | -               | -               | 12/57<br>(21%) | -                                                                   | 39.6/41.8 <sup>(MN)</sup><br>in select groups |
| Rena <sup>^</sup>       | 21  | 1/21<br>(5%)      | 0/13<br>(0%)   | 1/8<br>(12.5%)  | 1/21<br>(5%)    | 0/21<br>(0%)   | 124 <sup>(MD)</sup>                                                 | 68 <sup>(MD)</sup> (2-189)                    |
| Santos <sup>^</sup>     | 34  | 6/34<br>(17.6%)   | 0/27<br>(0%)   | 6/7<br>(85.7%)  | 6/34<br>(17.6%) | 0/34<br>(0%)   | 9 <sup>(MN)</sup>                                                   | 34 <sup>(MD)</sup>                            |
| Schmid                  | 22  | 3/22<br>(13.6%)   | 1/16<br>(6.3%) | 2/6<br>(33%)    | 1/22<br>(4.5%)  | 2/22<br>(9.1%) | 40 <sup>(MD)</sup><br>(14 – 42)                                     | 28 <sup>(MD)</sup> (1-160)                    |
| Tan <sup>^^</sup>       | 81  | 4/81<br>(4.9%)    | 0/70<br>(0%)   | 4/11<br>(36.4%) | 4/81<br>(4.9%)  | 0/81<br>(0%)   | -                                                                   | 56 <sup>(MD)</sup>                            |
| Tapias                  | 59  | 8/59<br>(14%)     | 3**            | 5**             | 8/59<br>(14%)   | 0/59<br>(0%)   | 6 years <sup>(MD)</sup> (2-16)                                      | 104 <sup>(MN)</sup>                           |
| Vejvodova <sup>^^</sup> | 22  | 2/22<br>(9.1%)    | 0/22<br>(0%)   | 2/22<br>(9.1%)  | 2/22<br>(9.1%)  | 0/22<br>(0%)   | -                                                                   | 45 <sup>(MD)</sup> (1-188)                    |
| Yeom                    | 41  | 5/41<br>(12.2%)   | 0/35<br>(0%)   | 5/6<br>(83.3%)  | 2/41<br>(4.9%)  | 3/41<br>(7.3%) | -                                                                   | Unclear                                       |

\* Personal communication with the authors suggested that the follow up was biased towards patients who represented with recurrence

\*\* Denominator unclear

<sup>^</sup> Patients with information available for number reresections for recurrence

<sup>^^</sup> Patients with information regarding repeated recurrence after re-resection
