# Supplementary material for: Management of solitary fibrous tumours of the pleura: a systematic review and meta-analysis
Source: PubMed Central journal article supplement — ERJ Open Res. 2020 Aug 17;6(3):00055-2020. doi: 10.1183/23120541.00055-2020 (PMC7430150; doi:10.1183/23120541.00055-2020), 2020-08-17
Supplement: 00055-2020.supplement6.pdf [file 00055-2020.supplement6.pdf]

| First author    | Year published | Years covered | Operation                                                                         | Mortality (%) | Morbidity (%) | Morbidity details                                                                                            |
|-----------------|----------------|---------------|-----------------------------------------------------------------------------------|---------------|---------------|--------------------------------------------------------------------------------------------------------------|
| Boddeart        | 2015           | 1984 - 2011   | Open thoracic surgery (71%)<br>VATS (29%)                                         | 0%            | 10%           | Pneumonia, transient O2 dependence, AF, prolonged mechanical ventilation, prolonged pneumothorax/air leak,   |
| Cardillo        | 2009           | 1990 - 2008   | VATS 69/110 (63%), (23% converted)<br>Thoracotomy 41/110 (37%)                    | 0.9%          | 10.9%         | AF, pleural effusion, prolonged air leak                                                                     |
| Chu             | 2012           | 1998 - 2010   | Open Thoracotomy (61.5%)<br>Simple thorascopic surgery (23.1%)<br>VATS (15.4%)    | 0%            | 0%            |                                                                                                              |
| Enon            | 2012           | 1985 - 2009   | Thoracotomy (100%) – benign only<br>VATS 20/42 (48%)                              | 0%            | 0%            |                                                                                                              |
| Franzen         | 2014           | 1992 - 2012   | Thoracotomy 22/42 (52%)<br>VATS 9/39 (23%)                                        | 0%            | 16.7%         | Prolonged air leak, infection, bleeding, intercostal neuralgia                                               |
| Guo             | 2011           | 2004 - 2008   | Thoracotomy 30/39 (77%)<br>Thoracotomy (81%),<br>Sternotomy (3.6%)<br>VATS (14%), | 0%            | 15.4%         | Pleural effusion, pulmonary infection                                                                        |
| Harrison–Phipps | 2009           | 1972 - 2002   | Transabdominal approach (1.2%)                                                    | 3.6%          | 11.8%         | AF, pleural effusion, bleeding, bleeding requiring re-operation, pneumonia, post-op ileus                    |
| Lahon           | 2012           | 1980 - 2010   | Thoracotomy (88%)<br>VATS (71.4%),<br>VATS + small thoracotomy (19%)              | 0.6%          | 5.7%          | PE death, ARDS, TIA, haemothorax, DVT, delerium tremens                                                      |
| Liu             | 2010           | 2000 - 2008   | Thoracotomy + VATS (9.5%)                                                         | 0%            | 0%            |                                                                                                              |
| Rena            | 2000           | 1984 - 2000   | Thoracotomy (95.2%) VATS (4.8%)<br>Thoracotomy (76.5%) VATS (20.6%)               | 0%            | 0%            |                                                                                                              |
| Santos          | 2005           | 1990 - 2003   | Median sternotomy (2.9%)<br>Thoracotomy (68.2%),<br>VATS (22.7%)                  | 0%            | 2.9%          | Pleural effusion                                                                                             |
| Schmid          | 2015           | 2002 - 2014   | Sternotomy (9.1%)<br>Thoracotomy (73.2%)                                          | 0%            | N/A           |                                                                                                              |
| Tan             | 2018           | 2003 - 2015   | VATS (26.8%)<br>Thoracotomy (69%)<br>VATS (24%)                                   | 0%            | 9%            |                                                                                                              |
| Tapias          | 2012           | 1977 - 2010   | Other (6%)                                                                        | 0%            | 12%           | Atelectasis (7%), haematuria, pulmonary oedema and postoperative bleeding requiring re-exploration (2%) each |
| Vejvodova       | 2017           | 2000 - 2015   | VATS (15%) Thoracotomy (85%)                                                      | 0%            | 0%            |                                                                                                              |
