# Supplementary material for: Management of solitary fibrous tumours of the pleura: a systematic review and meta-analysis
Source: PubMed Central journal article supplement — ERJ Open Res. 2020 Aug 17;6(3):00055-2020. doi: 10.1183/23120541.00055-2020 (PMC7430150; doi:10.1183/23120541.00055-2020), 2020-08-17
Supplement: 00055-2020.supplement7.pdf [file 00055-2020.supplement7.pdf]

| First author    | Pleural cases (resected) | Pre-operative percutaneous biopsy, n (%) | Type                   | Yield, n (%)                      |
|-----------------|--------------------------|------------------------------------------|------------------------|-----------------------------------|
| Boddeart        | 80                       | 20 (25%)                                 | CT FNA                 | 9/20 (45%)                        |
| Cardillo        | 110                      | 23 (20.9%)                               | FNA                    | 9/23 (39.1%)                      |
| Chu             | 40 (39)                  | 14/40* (35%)                             | Puncture biopsy        | 9/14 (62%)                        |
| Enon            | 25                       | 0 (0%)                                   |                        |                                   |
| Guo             | 39                       | 12 (30.7%)                               | CT FNA                 | 2/12 (16.7%)                      |
| Gupta           | 28                       | 14 (50%)                                 | 13 FNA                 | 1/13 (7.7%) FNA                   |
| Harrison–Phipps | 84                       | 22 (26%)                                 | 11 CNB                 | 11/11 (100%) CNB                  |
| Lahon           | 157                      | 23 (14.6%)                               | CT guided percutaneous | 10/22 (45%)                       |
| Liu             | 21                       | 1 (4.8%)                                 | CT guided FNA          | 0%                                |
| McGuire         | 26 (23)                  | 22/26* (84.6%)                           | 22 FNA<br>13 CNB       | 16/22 (72.7%) Total               |
| Rena            | 21                       | 8 (38.1%)                                | Transthoracic FNA      | 3/8 (37.5%)                       |
| Santos          | 34                       | 5 (14.7%)                                | CT FNA                 | 2/5 (40%)                         |
| Tapias          | 59                       | 21 (35.6%)                               | 17 FNA<br>4 Core       | 3/17 (17.6%) FNA<br>3/4 (75%) CNB |
| Vejvodova       | 22 (20)                  |                                          | CT CNB                 | 6 (27.3%)*                        |
| Yeom            | 41 (33)                  | 21/33 (63.6%)                            | CNB                    | 15/21 (80.9%)                     |

FNA – fine needle aspiration, CNB – core needle biopsy, CT – computed tomography.

\*Denominator = total number of patients rather than number resected.
