# Supplementary material for: Management of solitary fibrous tumours of the pleura: a systematic review and meta-analysis
Source: PubMed Central journal article supplement — ERJ Open Res. 2020 Aug 17;6(3):00055-2020. doi: 10.1183/23120541.00055-2020 (PMC7430150; doi:10.1183/23120541.00055-2020), 2020-08-17
Supplement: 00055-2020.supplement8.pdf [file 00055-2020.supplement8.pdf]

| First author    | Overall survival |          | Disease free survival |                                                 |
|-----------------|------------------|----------|-----------------------|-------------------------------------------------|
|                 | 5 years          | 10 years | 5 years               | 10 years                                        |
| Boddeart        | 90%              | 86%      | 86%                   | 82%                                             |
| Cardillo        |                  | 97.50%   |                       | 95.7% (B)<br>67.1% (M)<br>90.8%<br>(cumulative) |
| Franzen         |                  |          | 84%                   | 67%                                             |
| Harrison–Phipps | 83%              |          |                       |                                                 |
| Lahon           | 86%              | 77%      | 82%                   |                                                 |
| Schmid          | 89%              |          | 71%                   |                                                 |
| Tapias          | 92.4%            | 83.4%    | 87.2%                 | 72.1%                                           |
