# Supplementary material for: Management of solitary fibrous tumours of the pleura: a systematic review and meta-analysis
Source: PubMed Central journal article supplement — ERJ Open Res. 2020 Aug 17;6(3):00055-2020. doi: 10.1183/23120541.00055-2020 (PMC7430150; doi:10.1183/23120541.00055-2020), 2020-08-17
Supplement: 00055-2020.supplement9.pdf [file 00055-2020.supplement9.pdf]

| First author    | Year | Pleural cases | Oncological treatments                                  |                                                                                                           |                                                                                      |
|-----------------|------|---------------|---------------------------------------------------------|-----------------------------------------------------------------------------------------------------------|--------------------------------------------------------------------------------------|
|                 |      |               | Type(s)                                                 | Number of cases                                                                                           | Details                                                                              |
| Boddeart        | 2015 | 80            | Radiofrequency ablation only (1) at the time of relapse |                                                                                                           |                                                                                      |
| Bylicki         | 2015 | 68            | Chemotherapy                                            | First intent pre-operative chemotherapy (3)<br>(2 of 3 patients had disease progression during treatment) |                                                                                      |
|                 |      |               |                                                         | First intent post-operative chemotherapy (7)<br>(Based on De-Perrot staging)                              |                                                                                      |
|                 |      |               |                                                         | First intent exclusive chemotherapy (1)                                                                   |                                                                                      |
|                 |      |               |                                                         | Chemotherapy at recurrence (14)<br>(13 patients received further line of chemotherapy)                    |                                                                                      |
| Cardillo        | 2009 | 110           | Chemotherapy and radiotherapy                           | Chemotherapy (2)<br>Radiotherapy (4)                                                                      | Only used in patients who developed recurrence                                       |
| Chu             | 2012 | 40            | None                                                    |                                                                                                           |                                                                                      |
| DeVito          | 2015 | 28            | Chemotherapy                                            | Chemotherapy (1)                                                                                          |                                                                                      |
| England         | 1989 | 223           | Chemotherapy and radiotherapy                           | Chemotherapy (3)<br>Radiotherapy (7)<br>Chemoradiotherapy (4)                                             | All mSFTP. 8 cases were in combination with surgery, 6 had oncological therapy alone |
| Guo             | 2011 | 39            | None                                                    |                                                                                                           |                                                                                      |
| Gupta           | 2017 | 28            | None                                                    |                                                                                                           |                                                                                      |
| Harrison–Phipps | 2009 | 84            | Chemotherapy and radiotherapy                           | Chemotherapy (1)<br>Chemoradiotherapy (1)                                                                 | Post-operative                                                                       |
| Kim             | 2017 | 40            | Chemotherapy and radiotherapy                           | Chemotherapy (2)<br>Radiotherapy (1)                                                                      | Post-operative                                                                       |
| Lahon           | 2012 | 157           | Chemotherapy and radiotherapy                           | Chemotherapy (1),<br>Chemoradiotherapy (4)                                                                |                                                                                      |
|                 |      |               |                                                         | Chemotherapy (1)<br>Radiotherapy (3)<br>Chemoradiotherapy (1)                                             |                                                                                      |
| Liu             | 2010 | 21            | None                                                    |                                                                                                           |                                                                                      |
| McGuire         | 2016 | 26            | Chemotherapy and radiotherapy                           | Chemotherapy (1)<br>Radiotherapy (1)                                                                      | At recurrence                                                                        |
| Santos          | 2005 | 34            | Chemotherapy and brachytherapy                          | Chemotherapy (1)<br>Iodine brachytherapy (3)                                                              | Chemotherapy after recurrence of mSFTP                                               |
| Tan             | 2018 | 82            | Chemotherapy                                            | Chemotherapy (2)                                                                                          | Post-operative, both mSFTP                                                           |
| Vejvodova       | 2017 | 22            | Chemotherapy                                            | Chemotherapy (1)                                                                                          | For high malignant potential                                                         |

Key: mSFTP = malignant solitary fibrous tumour of the pleura

No reference to chemotherapy or radiotherapy in 8 articles (Enon, Franzen, Helage, O'Neil, Rena, Schmid, Tapias, Yeom)

Pleural specific information not available (Demicco 2012, Demicco 2017 and Gholami)
